# Supplementary material for: Radical Stress Is More Cytotoxic in the Nucleus than in Other Organelles
Source: MDPI journal article supplement (doi:10.3390/ijms20174147), 2019-08-25
Supplement: s1 [file s1]

## Sequences

### SuperNova-myc-N1

ATGGGCAGCGAGGTGGGCCCCGCCCTGTTCCAGAGCGACATGACCTTCAAGATCTTCATCGACGGCGAGGTGAAC  
GGCCAGAAGTTACCATTCGTGGCCGACGGCAGCAGCAAGTTCCCCCACGGCGACTTCAACGTGCACGCCGTGTGC  
GAGACCGGCAAGCTGCCCATGAGCTGGAAGCCCATCTGCCACCTGATCCAGTACGGCGAGCCCTTCTTCGCCCCG  
TACCCCGACGGCATCAGCCACTTCGCCCAGGAGTGCTTCCCCGAGGGCCTGAGCATCGACCGCACCGTGCGCTTC  
GAGAACGACGGCACCATGACCAGCCACCACACCTACGAGCTGGACGACACCTGCGTGGTGAGCCGCATCACCGTG  
AACTGCGACGGCTTCCAGCCCGACGGCCCCATCATGCGCGACCAGCTGGTGGACATCCTGCCCAGCGAGACCCAC  
ATGTTCCCCCACGGCCCCAACGCCGTGCGCCAGACCGCCACCATCGGCTTCACCACCGCCGACGGCGGCAAGATG  
ATGGGCCACTTCGACAGCAAGATGACCTTCAACGGCAGCCGCGCCATCGAGATCCCCGGCCCCCACTTCGTGACC  
ATCATCACCAAGCAGACCCGCGACACCAGCGACAAGCGCGACCACGTGTGCCAGCGCGAGGTGGCCTACGCCAC  
AGCGTGCCCCGCATCACCAGCGCCATCGGCAGCGACGAGGACGAGCAGAAGCTGATCAGCGAGGAGGACCTGTAA

### COX8-SuperNova

ATGAGCGTGCTGACCCCCCTGCTGCTGCGCGGCCTGACCGGCAGCGCCCGCCGCCTGCCCCGTGCCCCGCGCCAAG  
ATCCACAGCCTGAAGCTTTCGAATTCTGCAGTCGACGGTACCGCGGGCCCGGGATCCACCCGTGGCCACCATGGGC  
AGCGAGGTGGGCCCCGCCCTGTTCCAGAGCGACATGACCTTCAAGATCTTCATCGACGGCGAGGTGAACGGCCAG  
AAGTTACCATTCGTGGCCGACGGCAGCAGCAAGTTCCCCCACGGCGACTTCAACGTGCACGCCGTGTGCGAGACC  
GGCAAGCTGCCCATGAGCTGGAAGCCCATCTGCCACCTGATCCAGTACGGCGAGCCCTTCTTCGCCCCGTACCCC  
GACGGCATCAGCCACTTCGCCCAGGAGTGCTTCCCCGAGGGCCTGAGCATCGACCGCACCGTGCGCTTCGAGAAC  
GACGGCACCATGACCAGCCACCACACCTACGAGCTGGACGACACCTGCGTGGTGAGCCGCATCACCGTGAACCTGC  
GACGGCTTCCAGCCCGACGGCCCCATCATGCGCGACCAGCTGGTGGACATCCTGCCCAGCGAGACCCACATGTTTC  
CCCCACGGCCCCAACGCCGTGCGCCAGACCGCCACCATCGGCTTCACCACCGCCGACGGCGGCAAGATGATGGGC  
CACTTCGACAGCAAGATGACCTTCAACGGCAGCCGCGCCATCGAGATCCCCGGCCCCCACTTCGTGACCATCATC  
ACCAAGCAGACCCGCGACACCAGCGACAAGCGCGACCACGTGTGCCAGCGCGAGGTGGCCTACGCCACAGCGTG  
CCCCGCATCACCAGCGCCATCGGCAGCGACGAGGACGAGCAGAAGCTGATCAGCGAGGAGGACCTGTAA

### VAMP8-SuperNova

ATGGAGGAGGCCAGTGAGGTGCCGAAATGACCGAGTTAGGAACCTGCAGAGTGAGGTGGAGGGAGTCAAGAAT  
ATTATGACCCAGAATGTGGAGCGGATCTTGTCCAGAGGGGAGAACCTGGACCACCTCCGAAACAAGACAGAGGAC  
TTGGAAGCCACGTCTGAACACTTCAAGACAACGTCCAGAAAGGTGGCCCGGAAGTTCTGGTGGAAGAATGTGAAG  
ATGATTGTTCATCATCTGTGTGATTGTCTTATCATCGTCATCCTCATTTATACTTTTGGCACTGGTACCATCCCC  
ACTAAGGATCCACCCGTGGCCACCATGGGCAGCGAGGTGGGCCCCGCCCTGTTCCAGAGCGACATGACCTTCAAG  
ATCTTCATCGACGGCGAGGTGAACGGCCAGAAGTTACCATCGTGGCCGACGGCAGCAGCAAGTTCCCCCACGGC  
GACTTCAACGTGCACGCCGTGTGCGAGACCGGCAAGCTGCCCATGAGCTGGAAGCCCATCTGCCACCTGATCCAG  
TACGGCGAGCCCTTCTTCGCCCCGTACCCCGACGGCATCAGCCACTTCGCCCAGGAGTGCTTCCCCGAGGGCCTG  
AGCATCGACCGCACCGTGCGCTTCGAGAACGACGGCACCATGACCAGCCACCACACCTACGAGCTGGACGACACC  
TGCGTGGTGAGCCGCATCACCGTGAACCTGCGACGGCTTCCAGCCCGACGGCCCCATCATGCGCGACCAGCTGGTG  
GACATCCTGCCCAGCGAGACCCACATGTTCCCCCACGGCCCCAACGCCGTGCGCCAGACCGCCACCATCGGCTTC  
ACCACCGCCGACGGCGGCAAGATGATGGGCCACTTCGACAGCAAGATGACCTTCAACGGCAGCCGCGCCATCGAG  
ATCCCCGGCCCCCACTTCGTGACCATCATCACCAAGCAGACCCGCGACACCAGCGACAAGCGCGACCACGTGTGC  
CAGCGCGAGGTGGCCTACGCCACAGCGTGCCCCGCATCACCAGCGCCATCGGCAGCGACGAGGACGAGCAGAAG  
CTGATCAGCGAGGAGGACCTGTAA

## SuperNova-TGON2

ATGGTAAAGCTTGGTTTCAGAGGTGGGCCCCGCCCTGTTCCAGAGCGACATGACCTTCAAAATCTTCATCGACGGC  
GAGGTGAACGGCCAGAAGTTTACCATCGTGGCCGACGGCAGCAGCAAGTTCCCCACGGCGACTTCAACGTGCAC  
GCCGTGTGCGAGACCGGCAAGCTGCCCATGAGCTGGAAGCCCATCTGCCACCTGATCCAGTACGGCGAGCCCTTC  
TTCGCCCCGCTACCCCGACGGCATCAGCCATTTGCCCCAGGAGTGCTTCCCCGAGGGCCTGAGCATCGACCGCACC  
GTGCGCTTCGAGAACGACGGCACCATGACCAGCCACCACACCTACGAGCTGGACGACACCTGCGTGGTGAGCCGC  
ATCACCGTGAACTGCGACGGCTTCCAGCCCCGACGGCCCCATCATGCGCGACCAGCTGGTGGACATCCTGCCCAGC  
GAGACCCACATGTTCCCCACGGCCCCAACGCCGTGCGCCAGACCGCCACCATCGGCTTACCACCGCCGACGGC  
GGCAAGATGATGGGCCACTTCGACAGCAAGATGACCTTCAACGGCAGCCGCGCCATCGAGATCCCCGGCCCCACAC  
TTCGTGACCATCATCACCAAGCAGACCAGGGACACCAGCGACAAGCGCGACCACGTGTGCCAGCGCGAGGTGGCC  
TACGCCCCACAGCGTGCCCCGCATCACCAGCGCCATCGGTAGCGACGAGGATTCGAATTCTATGCAGTTTCTGGTG  
GCCCTGCTGCTGCTGAGCGTGGCCGTGGCCCGCGCCCTGCCAGCGCCAGCAAGCCCAACAACACCAGCAGCGAG  
AACAACCCCCCATCCAGCCCAGCACCCCCCTGCCCCCGGCGTGACATCAGCCAGCAGGTGAAGACCAACCGC  
CCCACCGACCAGCGCTGGAGAGCGACAAGGAGGGCCAGGACAAGACCGTGCGCCGACCAGCGCCAGCGTGAGC  
AGCGGCGTGAGAGCGCCACCAACCTGAACCTGGACGACAGCAAGAAGCACCCCCGAGACCGCCGACGCCAAGCTG  
AAGGAGACCCTGCAGCAGCTGCTGCCCCGTGGACCCCAAGCAGGAGAAGAGCGGCCAGAAGTTACCAAGGACAGC  
GGCAGCCCCACCGGCGGCGACAGCGACAACACCACCGGCGGCGACAGCAACAAGACCACCGGCGTGAGCAGCGAC  
AAGACCAGCGGCGGCGACAGCAACAAGCCCACCGGCAGCGACAACGACAAGCCCACCGGCGGCGACAGCAACAAG  
CCCACCAGCAAGGTGCCAGCAACACCGAGACCCCCAAGATCGACAAGGTGCAGCTGACCGAGAAGGGCCAGAAG  
CCCACCCTGATCAGCAAGACCGAGAGCGGCGAGAAGCTGGCCGGCGACAGCGACTTCAGCCTGAAGCCCAGAAAG  
GGCGACAAGAGCAGCGAGCCCACCGAGGACGTGGAGACCAAGGAGATCGAGGAGGGCGACACCGAGCCCAGGAG  
GGCAGCCCCCTGGAGGAGGAGAACGAGAAGGTGCTGGGCCCCAGCAGCAGCGAGAACCAGGAGGGCACCCCTGACC  
GACAGCATGAAGGACGAGAAGGACGACCACTACAAGGACAACAGCGGCAACACCAGCGCCGAGAGCAGCCACTTC  
TTCGCTTACCTGGTGACCGCCGCGCTGCTGGTGGCCGTGCTGTACATCGCCTACCACAACAAGCGCAAGATCATC  
GCCTTTCGCTTGGAGGGCAAGCGCAGCAAGGTGACCCGCGCCCCAAGGCCAGCGACTACCAGCGCCTGAACCTG  
AAGCTGCGGGATCCACCCGGGATCTAG

## ER-SuperNova

ATGGATCTGCTGAGCGTGCCCCCTGCTGCTGGGCCTGCTGGGCCTGGCCGTGGCCCGGGATCCAGGTTTCAGAGGTG  
GGCCCCGCCCTGTTCCAGAGCGACATGACCTTCAAAATCTTCATCGACGGCGAGGTGAACGGCCAGAAGTTTACC  
ATCGTGGCCGACGGCAGCAGCAAGTTCCCCACGGCGACTTCAACGTGCACGCCGTGTGCGAGACCGGCAAGCTG  
CCCATGAGCTGGAAGCCCATCTGCCACCTGATCCAGTACGGCGAGCCCTTCTTCGCCCCGCTACCCCGACGGCATC  
AGCCATTTTCGCCCCAGGAGTGCTTCCCCGAGGGCCTGAGCATCGACCGCACCGTGCGCTTCGAGAACGACGGCACC  
ATGACCAGCCACCACACCTACGAGCTGGACGACACCTGCGTGGTGAGCCGCATCACCGTGAAGTGCAGCGGCTTC  
CAGCCCCGACGGCCCCATCATGCGCGACCAGCTGGTGGACATCCTGCCAGCGAGACCCACATGTTCCCCACGGC  
CCCAACGCCGTGCGCCAGACCGCCACCATCGGCTTACCACCGCCGACGGCGGCAAGATGATGGGCCACTTCGAC  
AGCAAGATGACCTTCAACGGCAGCCGCGCCATCGAGATCCCCGGCCACACTTCGTGACCATCATCACCAGCAG  
ACCAGGGACACCAGCGACAAGCGCGACCACGTGTGCCAGCGCGAGGTGGCCTACGCCCACAGCGTGCCCCGCATC  
ACCAGCGCCATCGGTAGCGACGAGGATCTCGAGACCGGTAAGGACGAGCTGTAA

## NLS-SuperNova

ATGCCCCCGCCAAAGCGCGTGAAGCTGGACGTGGATCCAGGCAGCGAGGTGGGCCCCGCCCTGTTCCAGAGCGAC  
ATGACCTTCAAGATCTTCATCGACGGCGAGGTGAACGGCCAGAAGTTTACCATCGTGGCCGACGGCAGCAGCAAG  
TTCCCCACGGCGACTTCAACGTGCACGCCGTGTGCGAGACCGGCAAGCTGCCCATGAGCTGGAAGCCCATCTGC  
CACCTGATCCAGTACGGCGAGCCCTTCTTCGCCCCGCTACCCCGACGGCATCAGCCACTTCGCCCAGGAGTGCTTC  
CCCGAGGGCCTGAGCATCGACCGCACCGTGCGCTTCGAGAACGACGGCACCATGACCAGCCACCACACCTACGAG  
CTGGACGACACCTGCGTGGTGAGCCGCATCACCGTGAAGTGCAGCGGCTTCCAGCCCAGCGCCCCATCATGCGC  
GACCAGCTGGTGGACATCCTGCCAGCGAGACCCACATGTTCCCCACGGCCCCAACGCCGTGCGCCAGACCGCC  
ACCATCGGCTTACCACCGCCGACGGCGGCAAGATGATGGGCCACTTCGACAGCAAGATGACCTTCAACGGCAGC  
CGCGCCATCGAGATCCCCGGCCCCCACTTCGTGACCATCATCACCAGCAGACCCGCGACACCAGCGACAAGCGC  
GACCACGTGTGCCAGCGCGAGGTGGCCTACGCCCACAGCGTGCCCCGCATCACCGAGCGCCATCGGCAGCGACGAG  
GACGAGCAGAAGCTGATCAGCGAGGAGGACCTGTAA
